# Supplementary material for: Diarylfluorene‐Based Shape‐Persistent Organic Nanomolecular Frameworks via Iterative Friedel‐Crafts Protocol toward Multicomponent Organic Semiconductors
Source: Hindawi journal article supplement (doi:10.1155/2013/368202), 2013-01-01
Supplement: f1 [file 368202.f1.doc]

**Supplementary Information**

Diarylfluorene-based Shape-persistent Organic Nanomolecular Frameworks via Iterative Friedel-Crafts Protocol toward Multicomponent Organic Semiconductors

Guang-Wei Zhang a,┴, Long Wang a, ┴, Ling-Hai Xie, a ,* Xiao-Ya Hou a, Zheng-Dong Liu a, and Wei Huang, a,b ,*

a Center for Molecular Systems and Organic Devices (CMSOD), Key Laboratory for Organic Electronics & Information Displays (KLOEID) and Institute of Advanced Materials (IAM), Nanjing University of Posts & Telecommunications (NUPT), Nanjing 210046, China.

b Jiangsu-Singapore Joint Research Center for Organic/Bio- Electronics & Information Displays and Institute of Advanced Materials, Nanjing University of Technology, Nanjing 211816, China

┴These authors contributed equally.

*Author for correspondence ([iamlhxie@njupt.edu.cn](mailto:iamlhxie@njupt.edu.cn); iamwhuang@njupt.edu.cn)


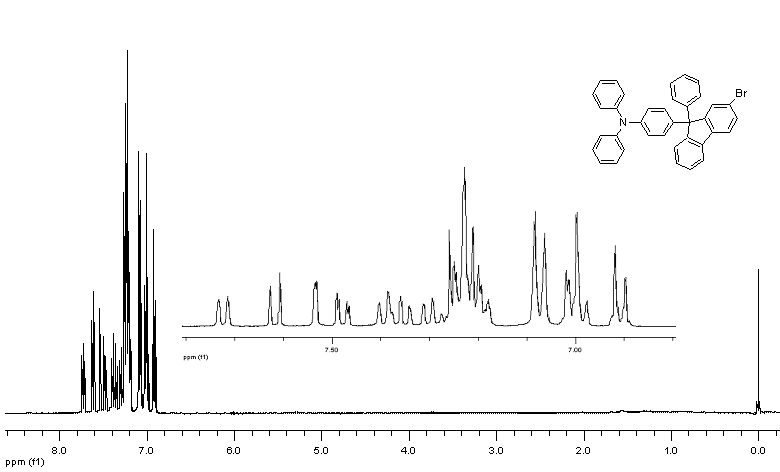


**Figure SI-1.** 1H NMR spectra of ***N*-phenyl-N-(4-(2-bromo-9-phenyl-fluoren-9-yl)phenyl)aniline (1)**


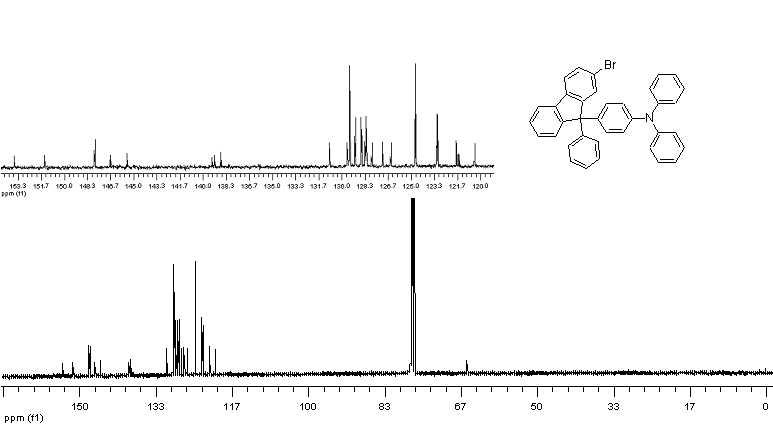


**Figure SI-2.** 13C NMR spectra of **N-phenyl-N-(4-(2-bromo-9-phenyl-fluoren-9-yl)phenyl)aniline (1)**


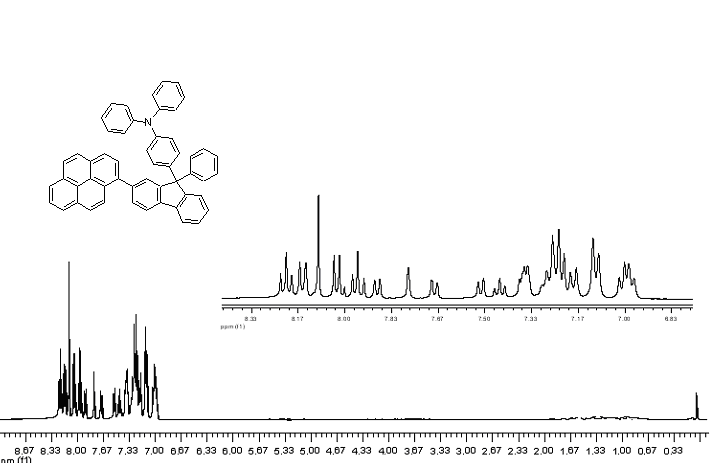


**Figure SI-3.** 1H NMR spectra of N-phenyl-N-(4-(2-(pyren-1-yl)-9-phenyl-fluoren-9-yl)phenyl)aniline (**PyFA)**


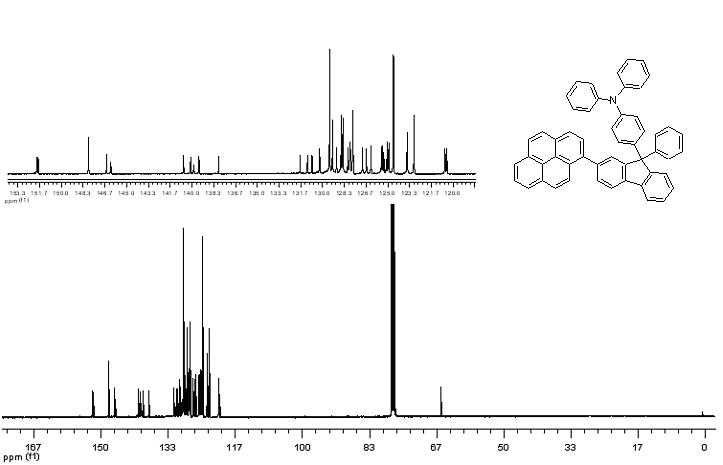


**Figure SI-4**. 13C NMR spectra of N-phenyl-N-(4-(2-(pyren-1-yl)-9-phenyl-fluoren-9-yl)phenyl)aniline (**PyFA)**


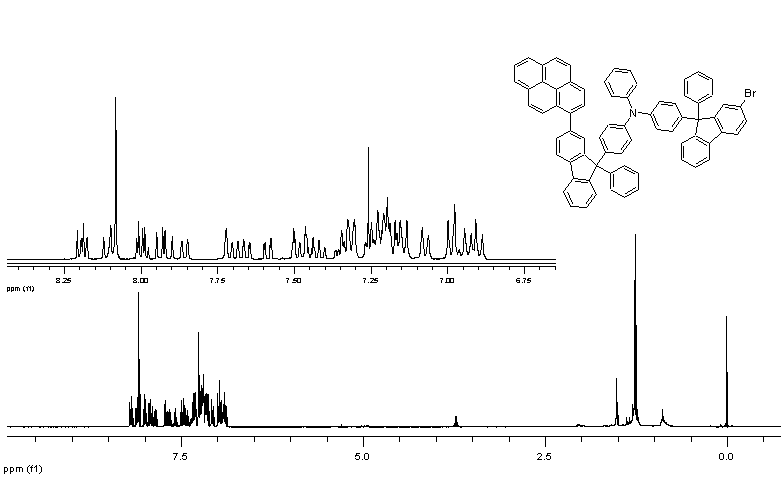


**Figure SI-5.** 1H NMR spectra of

**N-(4-(2-bromo-9-phenyl-fluoren-9-yl)phenyl)-N-(4-(9-phenyl-2-(pyren-2-yl)-fluoren-9-yl)phenyl)aniline** (2)


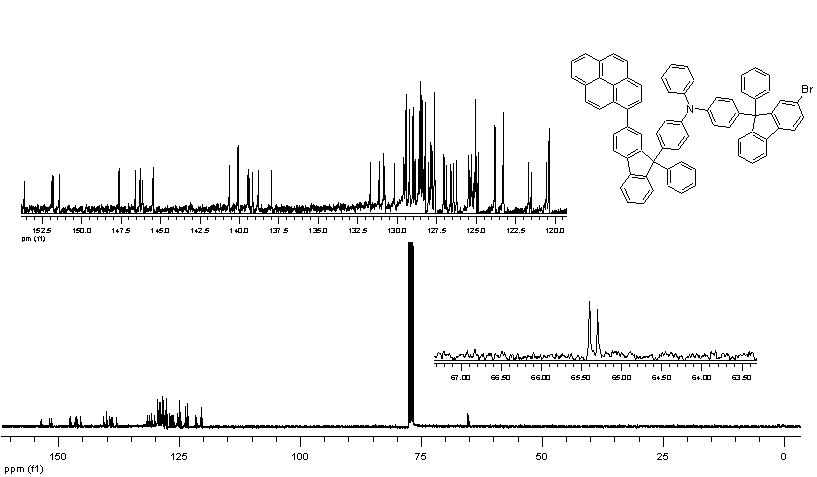


**Figure SI-6.** 13C NMR spectra of **N-(4-(2-bromo-9-phenyl-fluoren-9-yl)phenyl)-N-(4-(9-phenyl-2-(pyren-2-yl)-fluoren-9-yl)phenyl)aniline** (2)


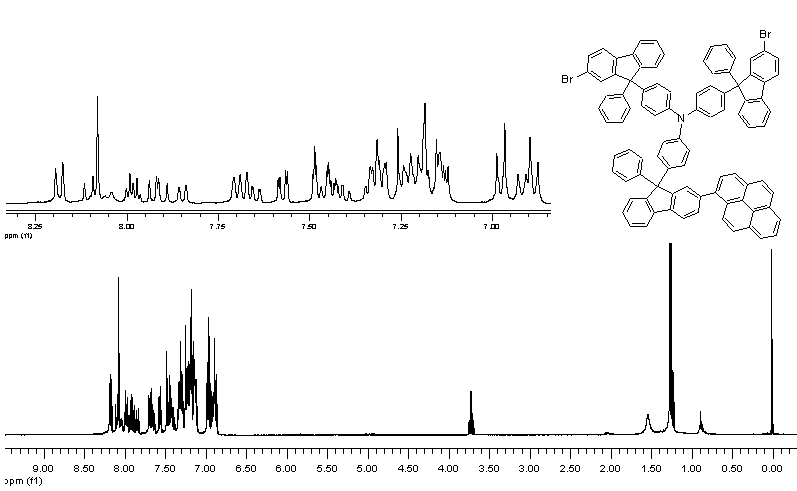


**Figure SI-7.** 1H NMR spectra of **N,N-bis(4-(2-bromo-9-phenyl-fluoren-9-yl)phenyl)-4-(9-phenyl-2-(pyren-1-yl)-fluoren-9-yl)aniline**


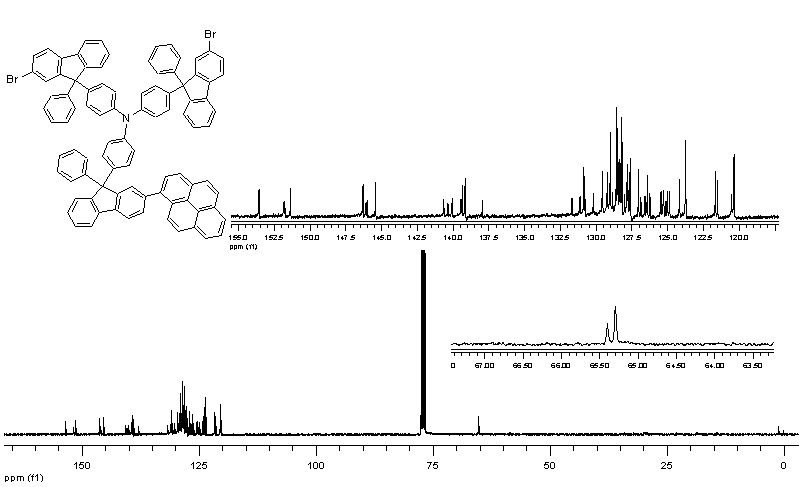


**Figure SI-8.** 13C NMR spectra of **N,N-bis(4-(2-bromo-9-phenyl-fluoren-9-yl)phenyl)- 4-(9-phenyl-2-(pyren-1-yl)-fluoren-9-yl)aniline**


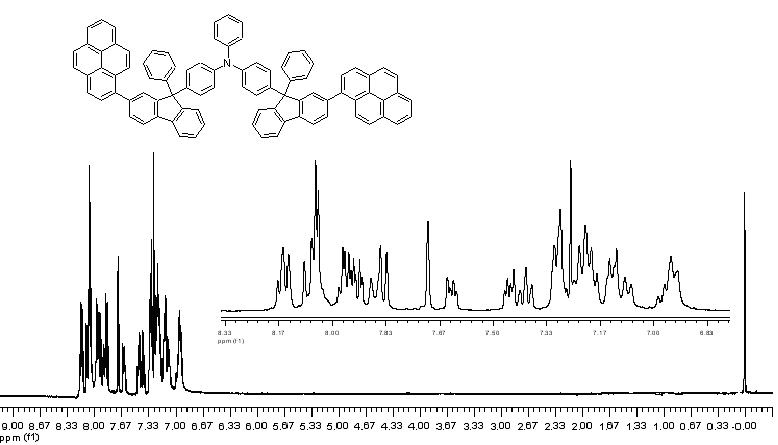


**Figure SI-9.** 1H NMR spectrum of N,N-bis(4-(2-(pyren-1-yl)-9-phenyl-fluoren-9-yl)phenyl) aniline (BPyFA)


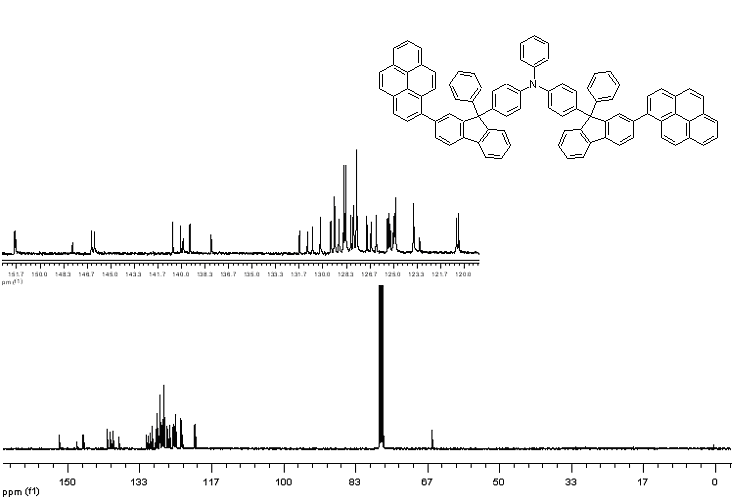


**Figure SI-10.** 13C NMR spectrum of N,N-bis(4-(2-(pyren-1-yl)-9-phenyl-fluoren-9-yl)phenyl) aniline (BPyFA)


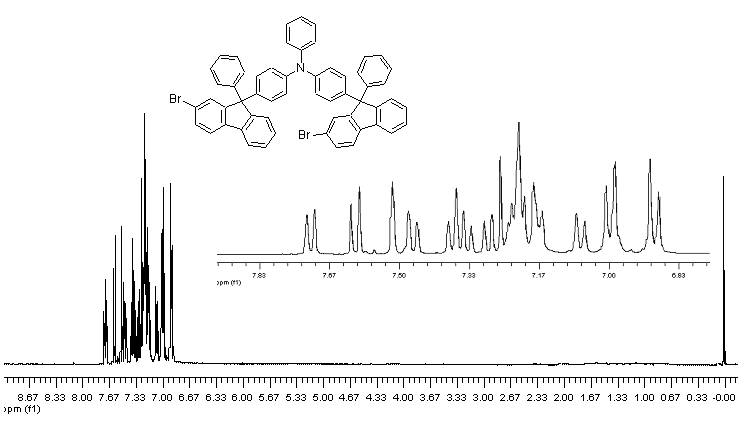


**Figure SI-11.** 1H NMR spectrum of N,N-bis(4-(2-bromo-9-phenyl-fluoren-9-yl)phenyl)aniline (**3)**


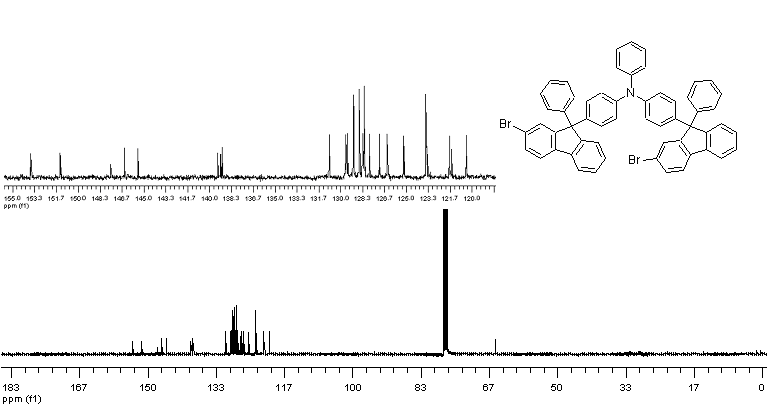


**Figure SI-12.** 13C NMR spectrum of N,N-bis(4-(2-bromo-9-phenyl-fluoren-9-yl)phenyl)aniline (**3)**


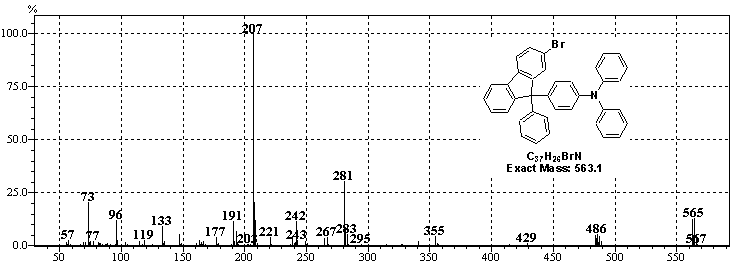


**Figure SI-13.** GC-MS spectra of ***N*-phenyl-N-(4-(2-bromo-9-phenyl-fluoren-9-yl)phenyl)aniline (1)**


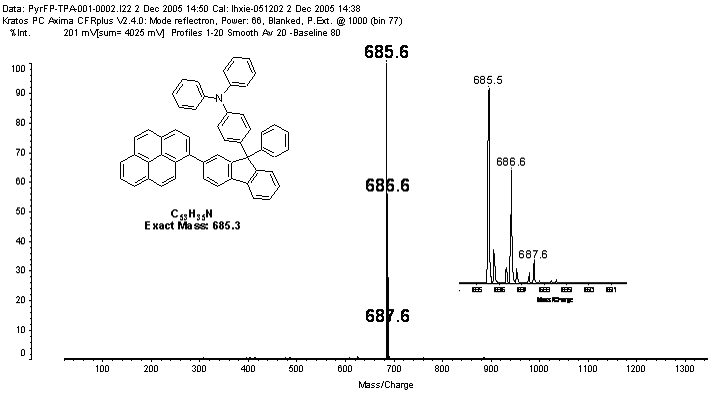


**Figure SI-14.** MALDI-tof-MS spectra of N-phenyl-N-(4-(2-(pyren-1-yl)-9-phenyl-fluoren-9-yl)phenyl)aniline (**PyFA)**


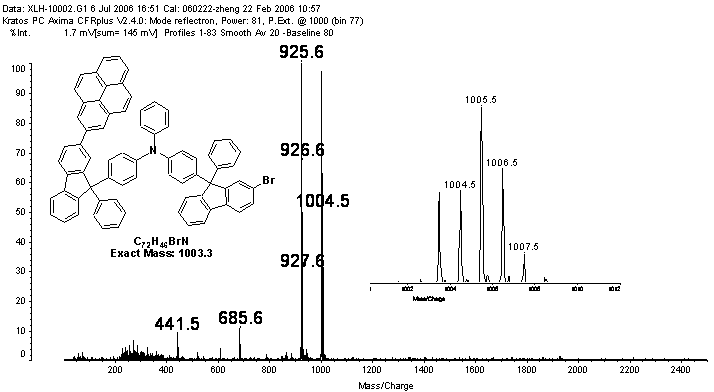


**Figure SI-15.** MALDI-tof-MS spectra of **N-(4-(2-bromo-9-phenyl-fluoren-9-yl)phenyl)-N-(4-(9-phenyl-2-(pyren-2-yl)-fluoren-9-yl)phenyl)aniline**


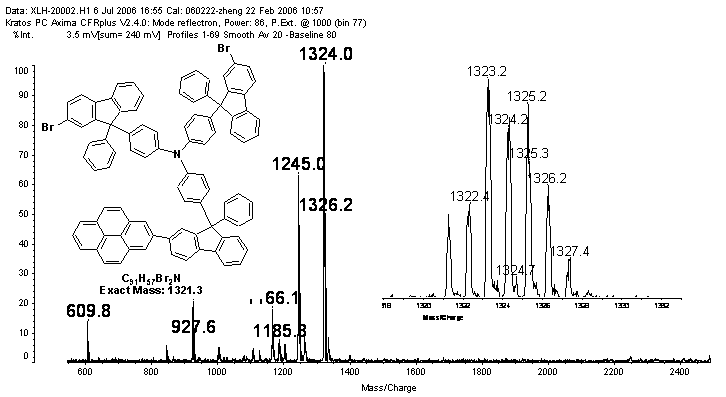


**Figure SI-16.** MALDI-tof-MS spectra of **N,N-bis(4-(2-bromo-9-phenyl-fluoren-9-yl)phenyl)-4-(9-phenyl-2-(pyren-1-yl)-fluoren-9-yl)aniline**


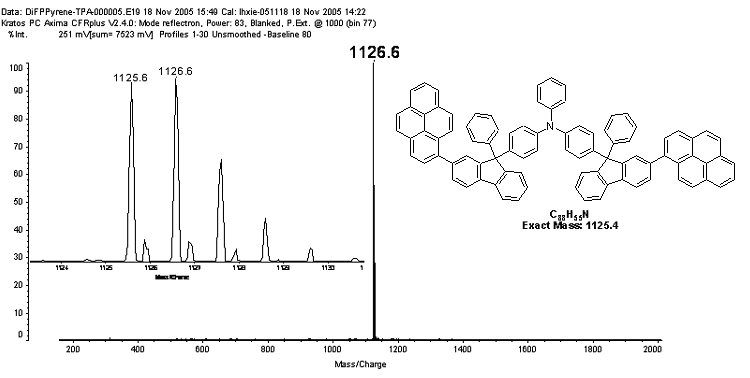


**Figure SI-17.** MODI-TOF spectra of N,N-bis(4-(2-(pyren-1-yl)-9-phenyl-fluoren-9-yl)phenyl) aniline (BPyFA)


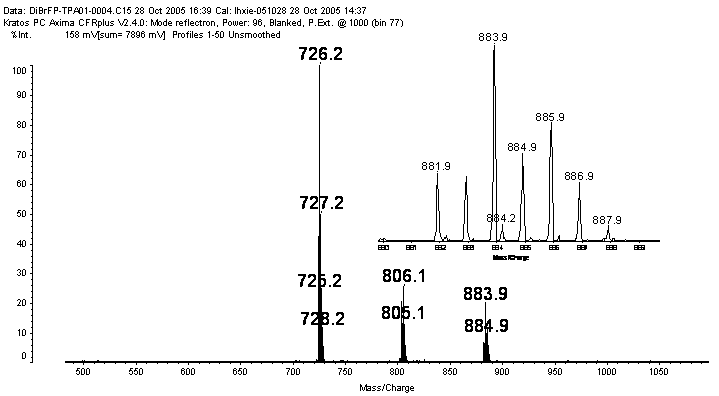


**Figure SI-18.** MODI-TOF spectra of N,N-bis(4-(2-bromo-9-phenyl-fluoren-9-yl)phenyl)aniline (**3)**


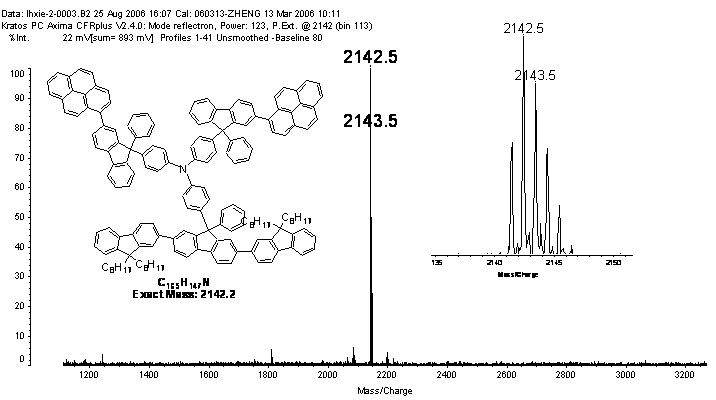


**Figure SI-19.** MODI-TOF spectra of N,N-bis(4-(2-(pyren-1-yl)-9-phenyl-fluoren-9-yl)phenyl)-4-(2,7-bis(9,9-dioctylfluoren-2-yl)-9-phenylfluoren-9-yl)aniline (**BPyFBFFA)**

**Figure SI-20.** Thermogravimetric analyses (TGA) curves of the PyFA, BPyFA, and BPyFBFFA

**Figure SI-21.** Differential scan calorimetry (DSC) curves of the PyFA, BPyFA, and BPyFBFFA

**Figure SI-22.** Cyclic voltammograms of compoundsPyFA and BPyFA
